# Supplementary material for: Dual-enzymatically cross-linked gelatin hydrogel enhances neural differentiation of human umbilical cord mesenchymal stem cells and functional recovery in experimental murine spinal cord injury
Source: Royal Society of Chemistry journal article supplement (doi:10.1039/d0tb02033h), 2020-11-19
Supplement: d0tb02033h1.pdf [file d0tb02033h1.pdf]

**Electronic Supporting Information (ESI)**

**Dual-enzymatically cross-linked gelatin hydrogel enhances neural differentiation of human umbilical cord mesenchymal stem cells and functional recovery in experimental murine spinal cord injury**

*Minghao Yao<sup>a, §, \*</sup>, Jinrui Li<sup>a, §</sup>, Junni Zhang<sup>a, §</sup>, Shanshan Ma<sup>a</sup>, Luyu Wang<sup>a</sup>, Feng Gao<sup>a</sup>, Fangxia Guan<sup>a, b, \*</sup>*

<sup>a</sup> School of Life Science, Zhengzhou University, 100 Science Road, Zhengzhou 450001, P. R. China

<sup>b</sup> Institute of Neuroscience, Zhengzhou University, Zhengzhou 450000, P. R. China

E-mail: guanfangxia@126.com, yao453343550@126.com

<sup>§</sup> Minghao Yao, Jinrui Li, and Junni Zhang are equal contributors

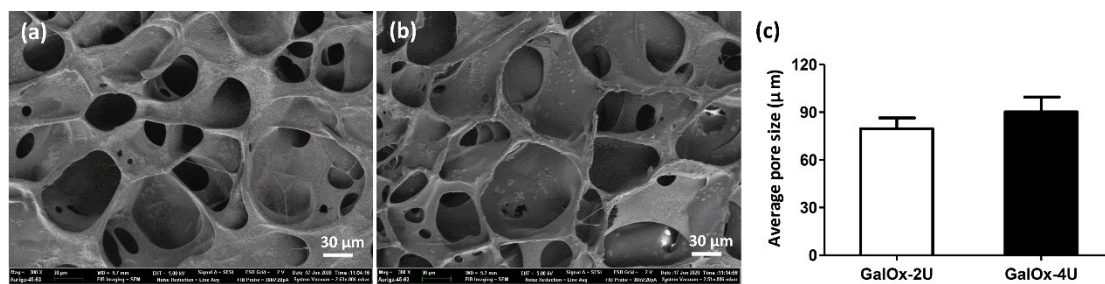

**Figure S1** Internal microtopography of GH hydrogels under scanning electron microscope and average pore size.

GalOx-2U hydrogel (a), GalOx-4U hydrogel (b), average pore size of GalOx-2U and GalOx-4U hydrogels (c).

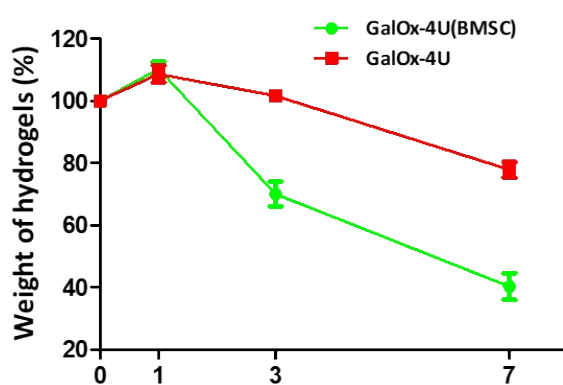

**Figure S2** The degradation of hUC-MSCs-loaded GalOx-4U hydrogel and cell-free GalOx-4U hydrogel on day 1, 3,

and 7.

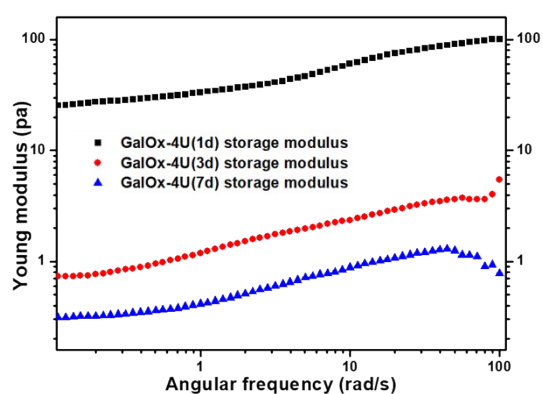

**Figure S3** Storage modulus of GalOx-4U hydrogels 1, 3, and 7 days after the fabrication measured by rheometer.

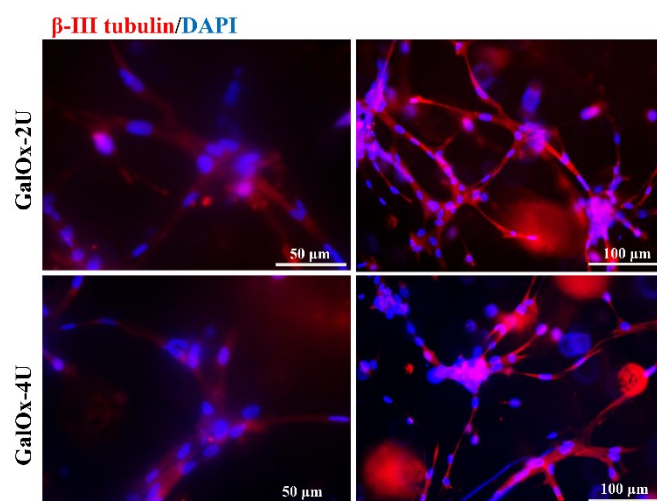

**Figure S4** Images of hUC-MSCs cultivation within GalOx-2U and GalOx-4U hydrogels by  $\beta$ -III tubulin immunofluorescent staining on day 3 (Enlarged images).

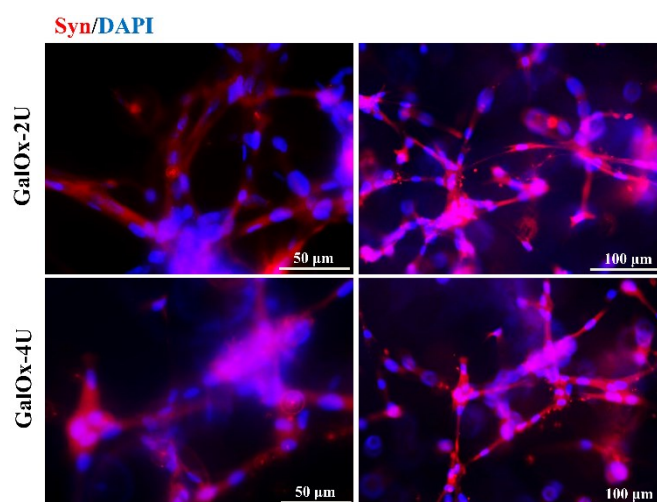

**Figure S5** Images of hUC-MSCs cultivation within GalOx-2U and GalOx-4U hydrogels by synapsin-1 immunofluorescent staining on day 5 (Enlarged images).

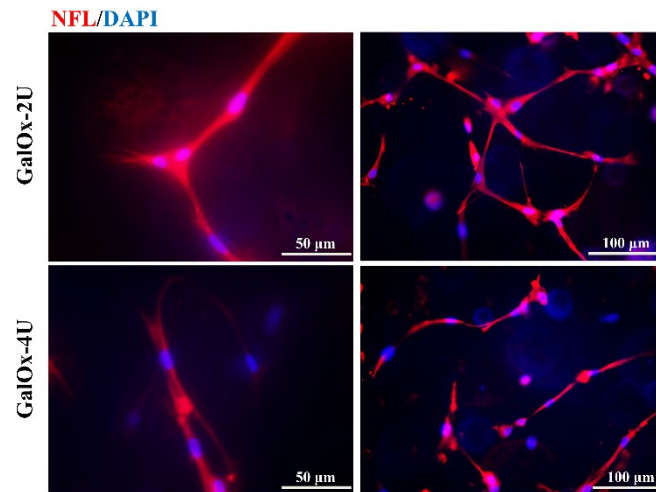

**Figure S6** Images of hUC-MSCs cultivation within GalOx-2U and GalOx-4U hydrogels by NFL immunofluorescent staining on day 7 (Enlarged images).

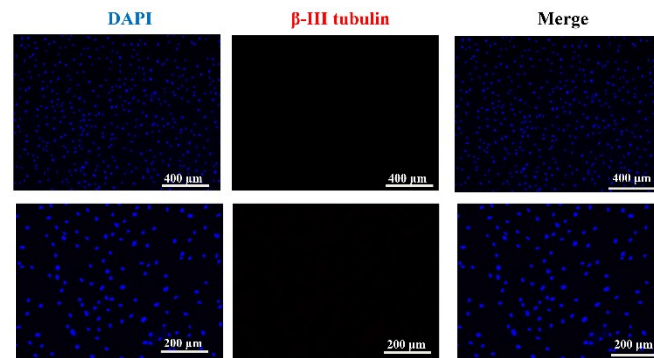

**Figure S7** β-III tubulin immunostaining of hUC-MSCs after the cultivation on cell culture plate for 3 days before encapsulated in hydrogel.

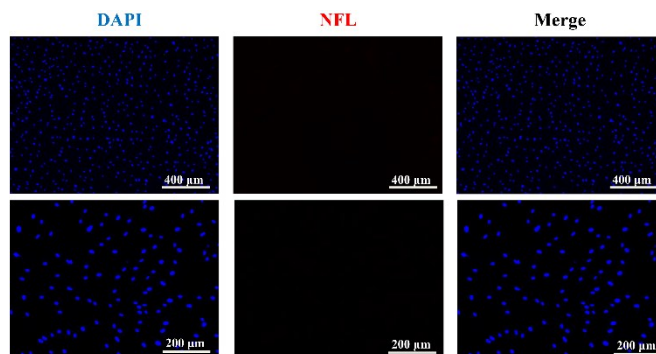

**Figure S8** NFL immunostaining of hUC-MSCs after the cultivation on cell culture plate for 3 days before encapsulated in hydrogel.

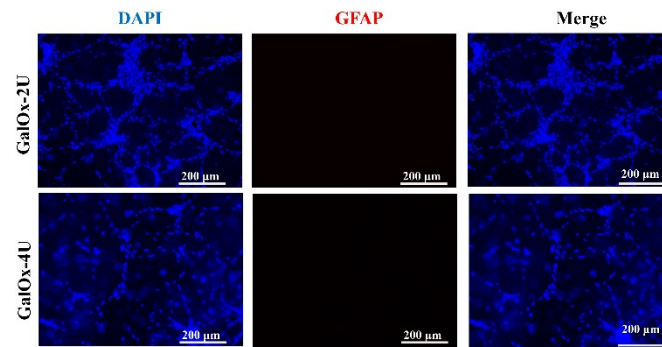

**Figure S9** GFAP immunostaining of hUC-MSCs within GalOx-2U and GalOx-4U hydrogels on day 3.

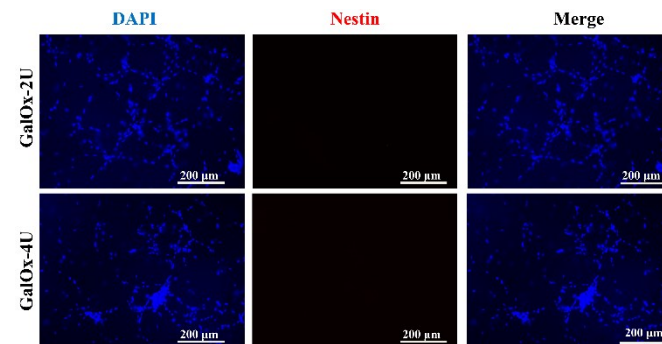

**Figure S10** Nestin immunostaining of hUC-MSCs within GalOx-2U and GalOx-4U hydrogels on day 3.

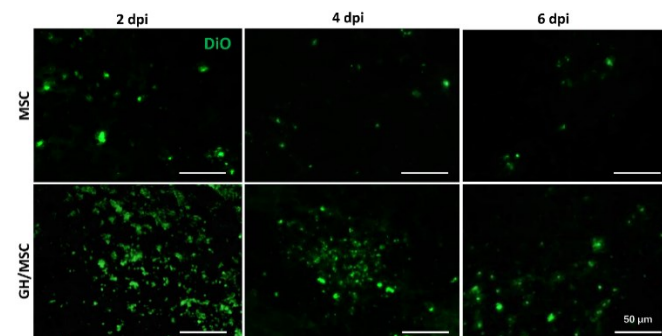

**Figure S11** Images of DiO-labeled hUC-MSC in the damaged spinal cords on 2, 4, and 6 dpi of GH/MSC group and MSC group for analyzing cellular retention.

Table S1 Wet weight, dry weight, and water content of spinal cords in Normal, NS, GH, MSC, and GH/MS C groups.

|                   | Normal     |      |      | NS         |      |      | GH         |      |      | MSC        |      |      | GH/MS C    |      |      |
|-------------------|------------|------|------|------------|------|------|------------|------|------|------------|------|------|------------|------|------|
| wet weight (mg)   | 37.0       | 37.2 | 36.7 | 26.4       | 40.0 | 34.1 | 33.2       | 35.7 | 36.2 | 31.0       | 33.9 | 33.3 | 42.6       | 31.7 | 32.6 |
| dry weight (mg)   | 10.7       | 12.0 | 11.3 | 3.9        | 5.7  | 3.5  | 7.3        | 6.6  | 6.3  | 6.2        | 7.3  | 7.8  | 11.6       | 10.9 | 9.6  |
| water content (%) | 71.1       | 67.7 | 69.2 | 85.2       | 85.8 | 89.7 | 78.0       | 81.5 | 82.6 | 80.0       | 78.5 | 76.6 | 72.8       | 65.6 | 70.6 |
| Mean±SD (%)       | 69.3 ± 1.7 |      |      | 86.9 ± 2.5 |      |      | 80.7 ± 2.4 |      |      | 78.4 ± 1.7 |      |      | 69.7 ± 3.7 |      |      |
